# Supplementary material for: An unexpected role for a Wnt-inhibitor: Dickkopf-1 triggers a novel cancer survival mechanism through modulation of aldehyde-dehydrogenase-1 activity
Source: PubMed Central journal article supplement — Cell Death Dis. 2014 Feb 27;5(2):e1093–. doi: 10.1038/cddis.2014.67 (PMC3944275; doi:10.1038/cddis.2014.67), 2014-02-27

Figure S1: Edu incorporation in MOS-J cells and  $\beta$ -catenin immunostaining with overlays and controls

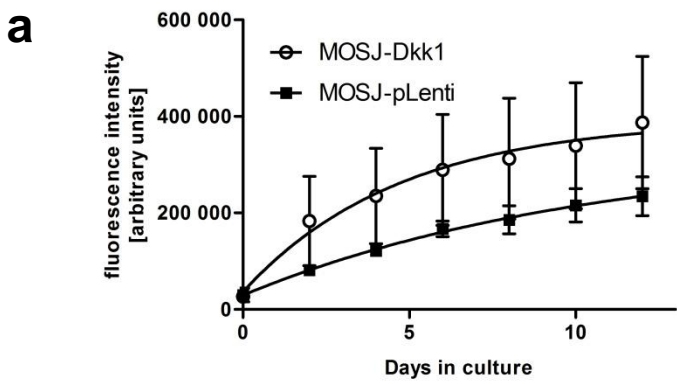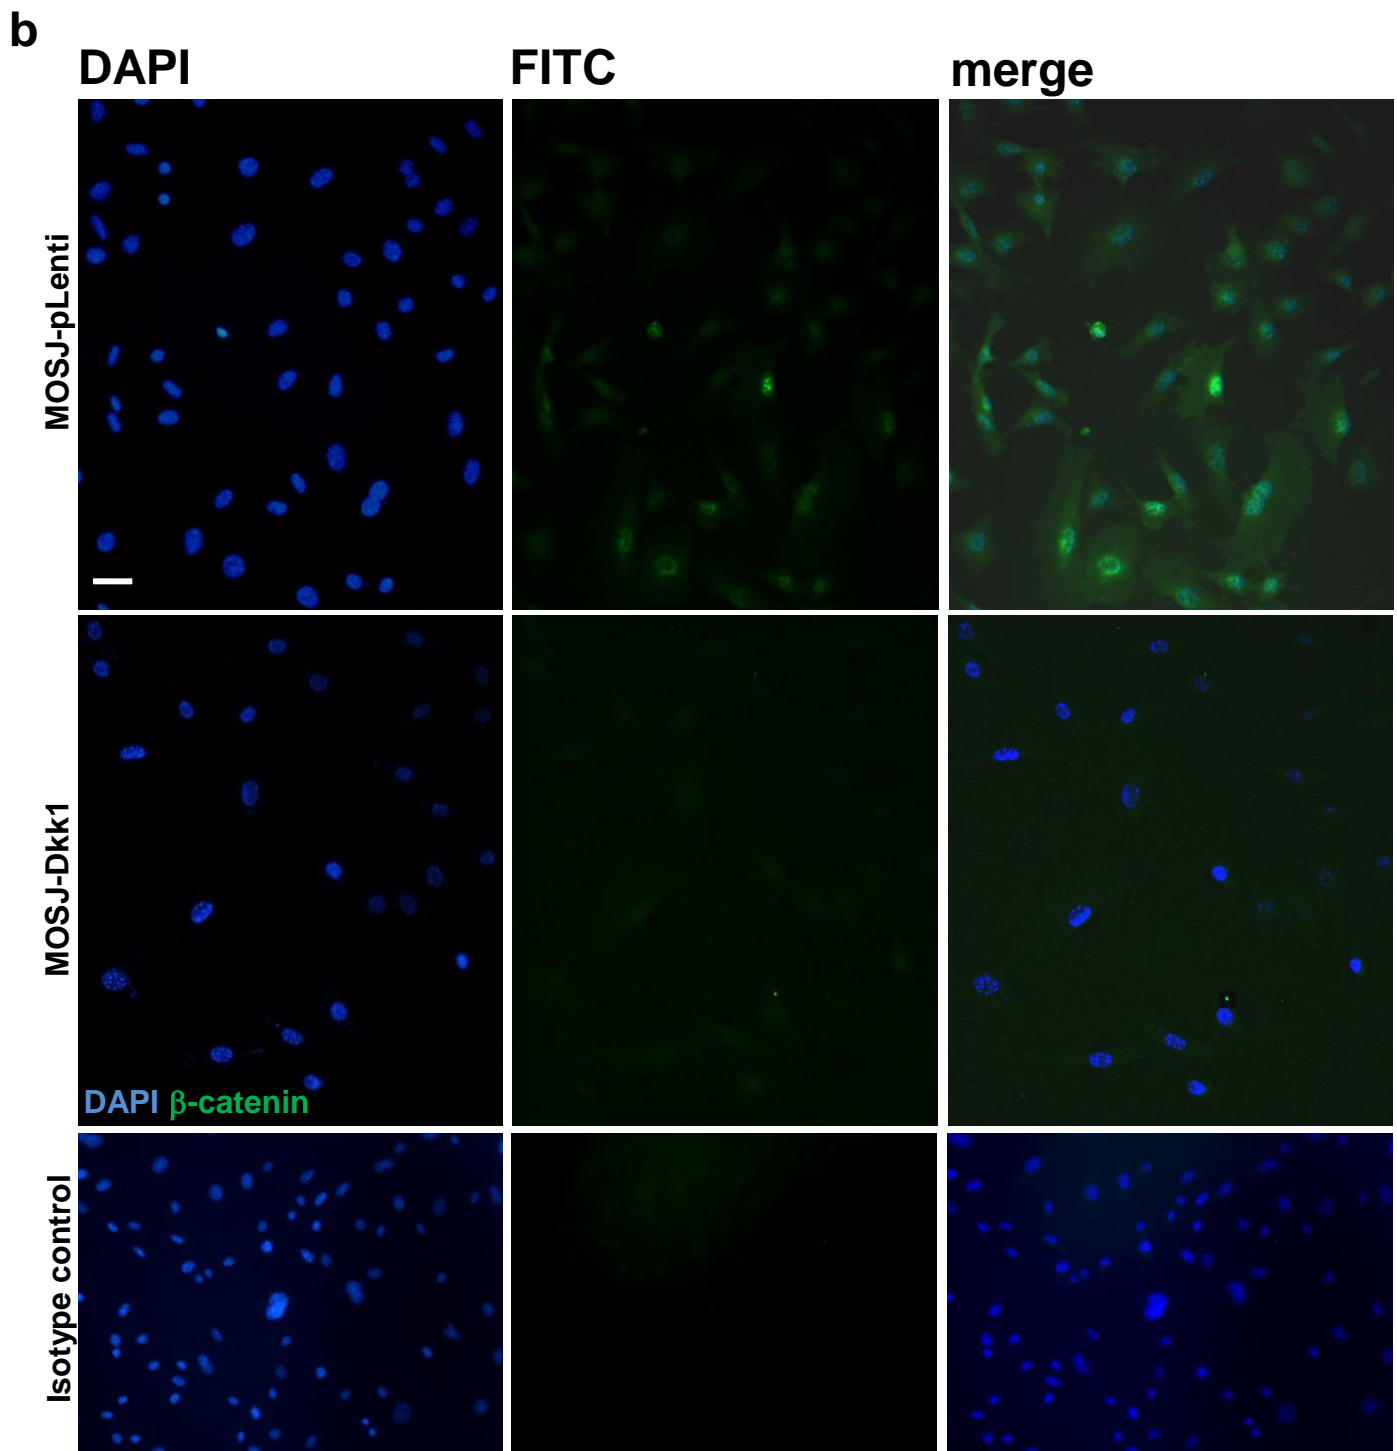

Supplement: cddis201467x1.pdf [file cddis201467x1.pdf]
