# Supplementary material for: An unexpected role for a Wnt-inhibitor: Dickkopf-1 triggers a novel cancer survival mechanism through modulation of aldehyde-dehydrogenase-1 activity
Source: PubMed Central journal article supplement — Cell Death Dis. 2014 Feb 27;5(2):e1093–. doi: 10.1038/cddis.2014.67 (PMC3944275; doi:10.1038/cddis.2014.67), 2014-02-27
Supplement: cddis201467x6.pdf [file cddis201467x6.pdf]

## Supplemental Figure legends S1-S5:

**Figure S1a: EdU incorporation assay.** MOSJ-Dkk1 cells proliferate faster than MOSJ-pLenti control cells.

Cumulative fluorescence signal over time is proportional to the incorporated nucleoside analog EdU. Values are means +/- SD (n=4).

**Figure S1b: Immunocytochemistry for  $\beta$ -catenin in MOSJ-Dkk1 and MOSJ-pLenti cells.** The  $\beta$ -catenin has been visualized with a FITC-conjugated antibody (green). Nuclei have been lightly counterstained with 4',6-diamidino-2-phenylindole, dihydrochloride (DAPI). Bar= 20  $\mu$ m

**Figure S2: Morphology of post-confluent monolayers.** During confluency, MOSJ-pLenti control cells show classical morphological signs of apoptosis whereas MOSJ-Dkk1 cells maintain stable confluent monolayers with frequent cell divisions (asterisks). Bar = 100  $\mu$ m

**Figure S3a: Viability of cells that received siRNA against Dkk-1.** Viability (by trypan blue exclusion) and the number of recovered cells 3 days after transfection of Dkk-1 siRNA or scrambled siRNA. Values are means +/- SD (n=3). P values  $p < 0.05 = *$  with Student's t-test.

**Figure S3b: Viability of MOSJ cells after treatment with TNKiIII or CCT063477.** The number of recovered pLenti-MOSJ cells after either 20 days of post confluence or 2 days in the presence of H<sub>2</sub>O<sub>2</sub> (100 $\mu$ M) after treatment with TNKiIII or CCT063477. The y-axes refer to the number of cells recovered from a 4 cm<sup>2</sup> well. Values are means +/- SD (n=3). P values  $p < 0.05 = *$  with ANOVA and Dunnet's post-test.

**Figure S3c: Western blot assays for MKK7 and p-MKK7.**

**Figure S4: Box and whisker plots of the average diameter of tibial medullary canals.** MOSJ-Dkk1 tibias are more hollow than MOSJ-pLenti counterparts, suggesting extensive remodelling. Results displayed as box and whisker plots with the boxes representing the 25-75<sup>th</sup> percentiles, the center line representing the median, and the whiskers representing the full range of data. (n=4); \*\*\*  $P < 0.001$

**Figure S5: Histology of lesions in femurs** Serial sections of MOS-J tumors were stained with hematoxylin and eosin (**a,e**) and trichrome (**b-d,f-h**). MOSJ-pLenti cells form tumors that displace compartments of the surrounding muscle (**a**). Areas of cartilage, bone and fat differentiation consistent with the underlying osteochondrosarcoma phenotype are evident (**b-d**). In contrast, MOSJ-Dkk1 tumors demonstrate aggressive growth behavior (**e,f**), with destructive soft tissue invasion and lytic bone involvement (**arrows, g**). Note the lack of differentiation resulting in highly homogeneous masses of more primitive spindle-like cells (**h**).

Bars: 1 mm.
