# Supplementary figures and images for: An unexpected role for a Wnt-inhibitor: Dickkopf-1 triggers a novel cancer survival mechanism through modulation of aldehyde-dehydrogenase-1 activity
Source: PubMed Central journal article supplement — Cell Death Dis. 2014 Feb 27;5(2):e1093–. doi: 10.1038/cddis.2014.67 (PMC3944275; doi:10.1038/cddis.2014.67), 2014-02-27

Figure S2: Apoptosis and cell detachment in post-confluent MOSJ-pLenti cells.

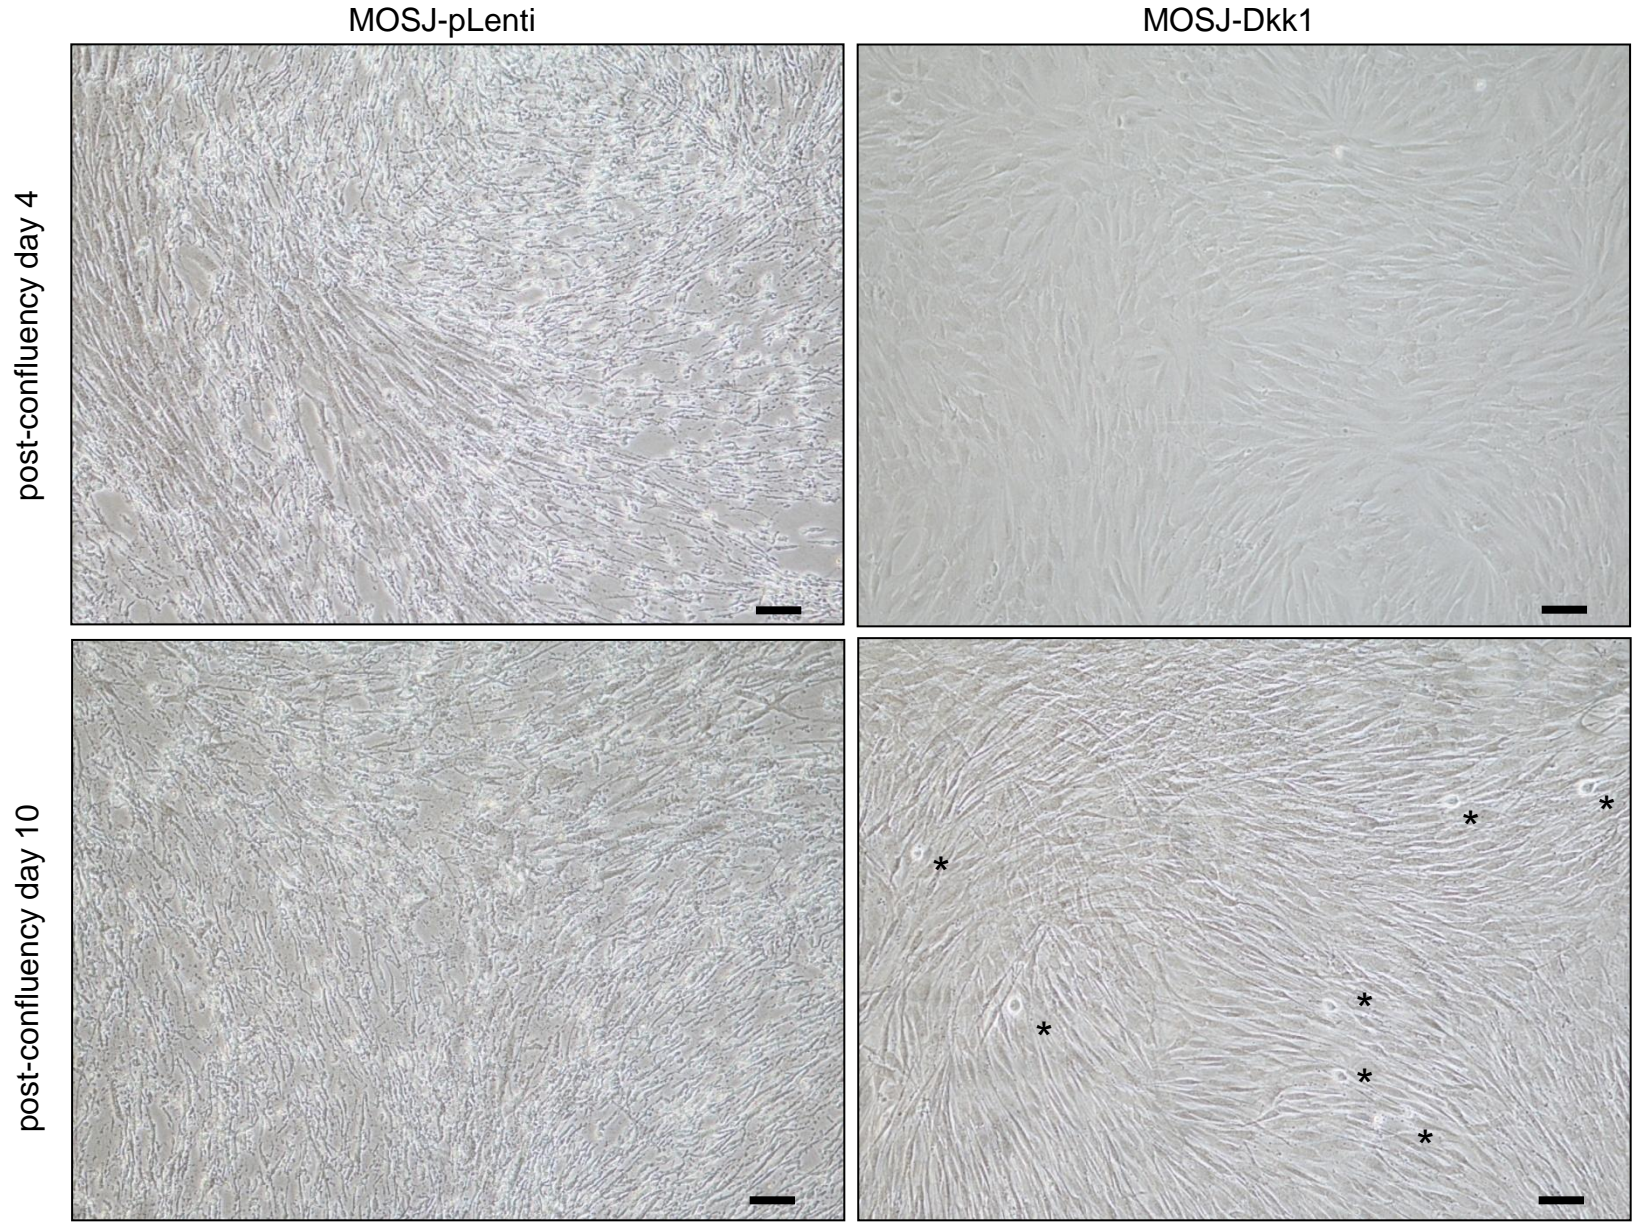

Supplement: cddis201467x2.pdf [file cddis201467x2.pdf]

**a**

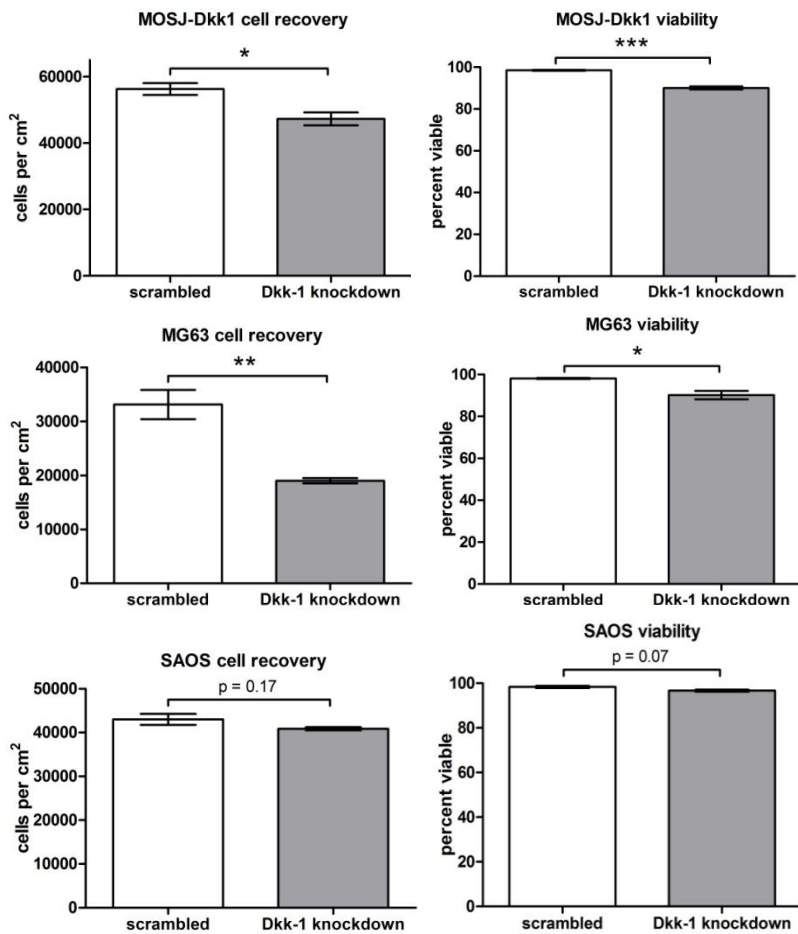

**b**

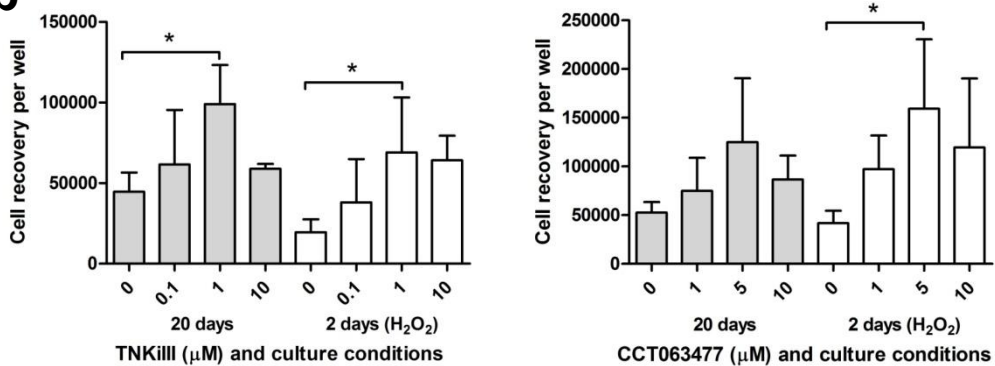

**c**

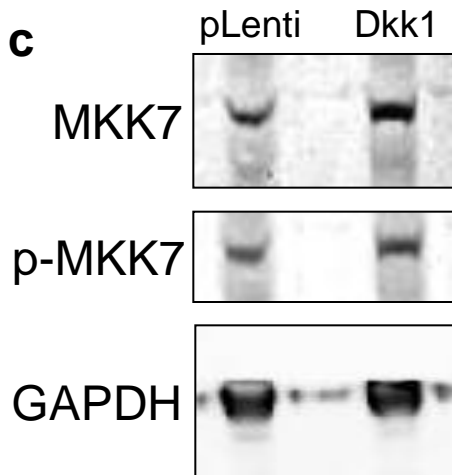

Supplement: cddis201467x3.pdf [file cddis201467x3.pdf]

Figure S5: Effect of MOSJ-pLenti and MOSJ-Dkk1 tumors on femurs.

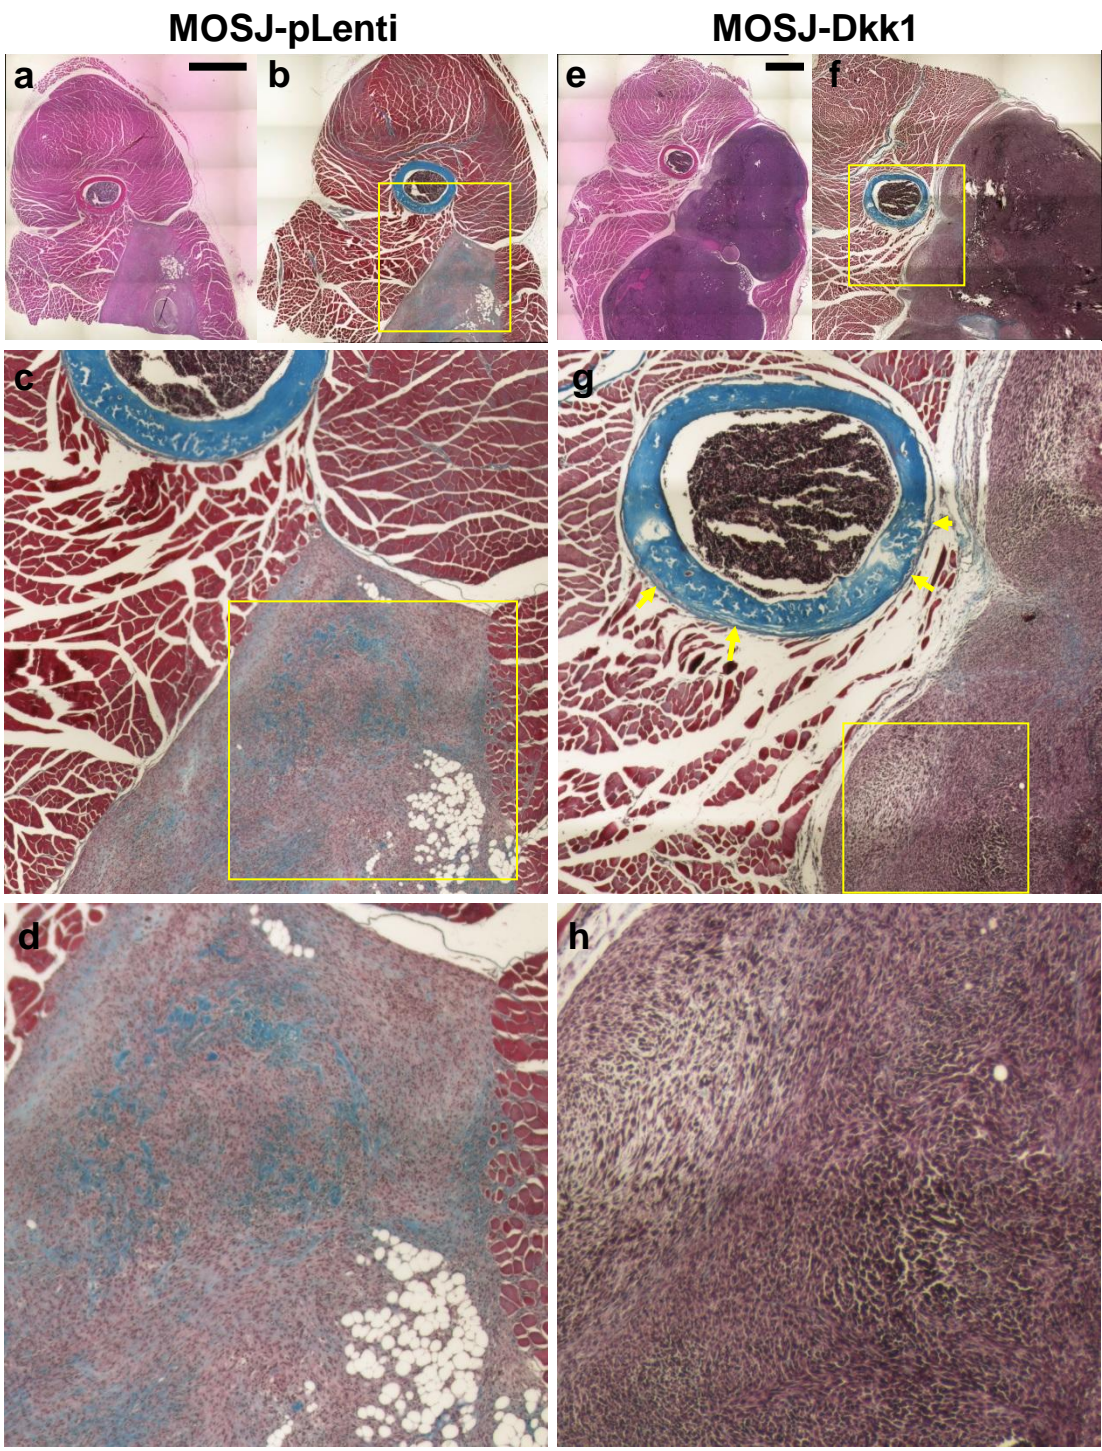

Supplement: cddis201467x5.pdf [file cddis201467x5.pdf]
